# Supplementary material for: Essential Oil Compositions of Pinus Species (P. contorta Subsp. contorta, P. ponderosa var. ponderosa, and P. flexilis); Enantiomeric Distribution of Terpenoids in Pinus Species
Source: MDPI journal article supplement (doi:10.3390/molecules27175658), 2022-09-02
Supplement: s1 [file s1]

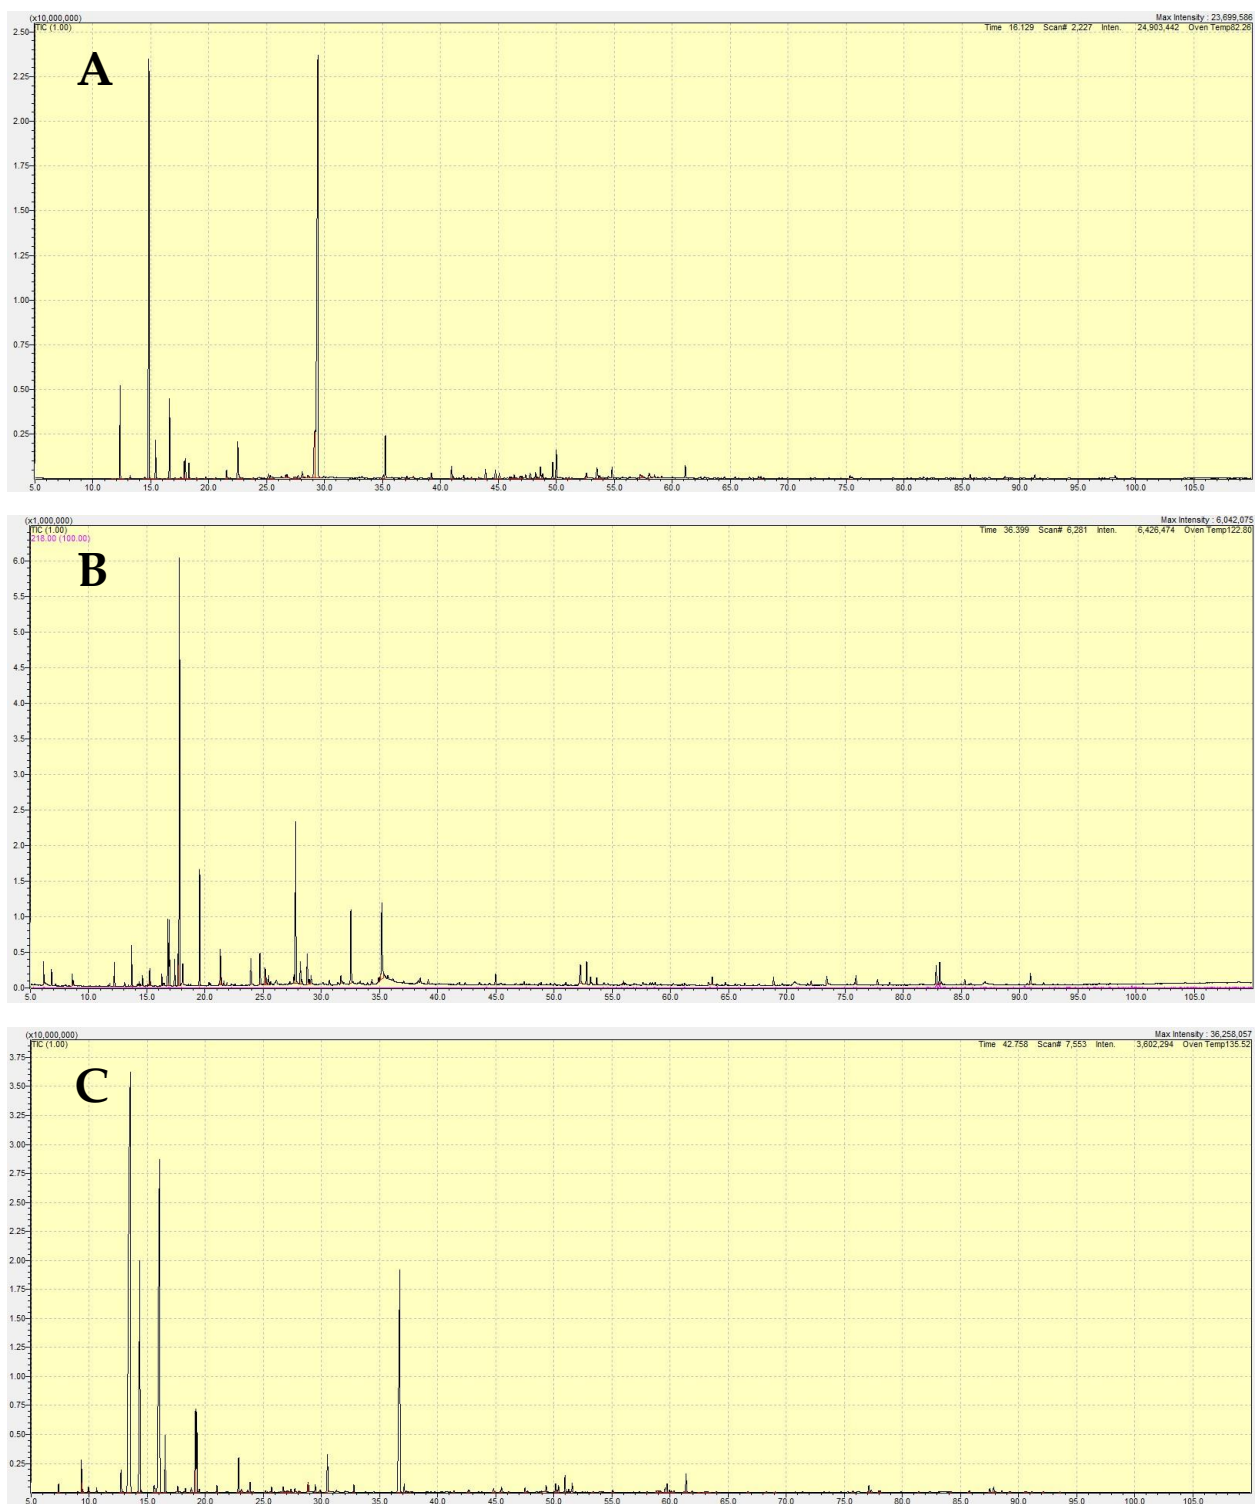

**Figure S1.** Gas chromatograms of *Pinus ponderosa* var. *ponderosa* (A), *Pinus contorta* subsp. *contorta* (B), and *Pinus flexilis* (C).
